# Supplementary material for: The power of transfer learning in agricultural applications: AgriNet
Source: Front Plant Sci. 2022 Dec 14;13:992700. doi: 10.3389/fpls.2022.992700 (PMC9794606; doi:10.3389/fpls.2022.992700)
Supplement: Supplementary file 1 [file Table_1.xlsx]

## Sheet: Sheet1
Image Sources	Class	Total	Inception-v3	Xception	VGG19	VGG22	InceptionResnNet-v2
[32]	Alstonia_Scholaris_Diseased	284	92.19	90.2	98	86.3	94.1
[32]	Alstonia_Scholaris_Healthy	209	97.25	86.1	97.2	91.7	97.2
[24,25]	Apple_Apple_Scab	727	83.45	80	89	90.3	90.3
[24]	Apple_Black_Rot	624	90.4	96	100	100	89.6
[24,25]	Apple_Cedar_Apple_Rust	363	87.67	83.6	86.3	93.2	87.7
[24,25]	Apple_Healthy	1626	85.66	85.3	89.8	89.4	88.3
[32]	Arjun_Diseased	262	82.98	89.4	95.7	93.6	89.4
[32]	Arjun_Healthy	250	95.45	90.9	95.5	97.7	95.5
[20]	Background_Without_Leaves	1173	86.46	92.6	75.5	82.5	92.1
[32]	Bael _Diseased	151	100	100	100	100	95.8
[32]	Basil_Healthy	178	100	96.7	100	100	100
[33]	Bean_Angular_Leaf_Spot	432	91.95	79.3	79.3	87.4	93.1
[33]	Bean_Healthy	430	97.67	93	94.2	100	100
[33]	Bean_Rust	436	86.36	93.2	96.6	94.3	92
[24]	Blueberry_Healthy	1919	96.3	97.5	97.8	97.8	98.1
[29]	Cassava_ Brown_Streak_Disease	1671	70.21	80.7	83.6	82.9	78.2
[29]	Cassava_ Mosaic_Disease	2958	92.86	81.2	93.8	90.4	94
[29]	Cassava_Bacterial_Blight	466	51.06	50	46.8	50	58.5
[29]	Cassava_Green_Mite	773	71.61	55.5	72.9	63.9	54.8
[29]	Cassava_Healthy	319	48.44	53.1	59.4	76.6	60.9
[24,25]	Cherry_Healthy	910	97.8	95.6	96.7	96.2	96.2
[24]	Cherry_Powdery_Mildew	1052	96.68	91.5	99.1	100	99.1
[32]	Chinar_Diseased	153	95.83	95.8	83.3	95.8	95.8
[32]	Chinar_Healthy	103	90.48	81	95.2	76.2	90.5
[28]	Coffee_Cercospora	326	90.77	75.4	95.4	95.4	96.9
[28]	Coffee_Health	291	100	98.1	98.1	100	100
[28]	Coffee_Miner	540	87.96	91.7	98.1	96.3	85.2
[28]	Coffee_Phoma	464	98.92	100	96.8	94.6	97.8
[28]	Coffee_Rust	624	98.4	99.2	99.2	100	98.4
[24,25]	Corn_Cercospora_ Gray_Leaf_Spot	581	55.56	85.5	87.2	91.5	72.6
[24,25]	Corn_Common_Rust	1638	95.8	96.2	95.4	96.9	97.7
[24]	Corn_Healthy	1192	99.57	99.6	99.6	100	98.7
[24,25]	Corn_Northern_Leaf_Blight	1506	94.07	87.7	89.8	93.6	93.6
[26]	Cotton_Leaf_Diseased	346	94.32	97.1	98.6	95.7	98.6
[26]	Cotton_Leaf_Healthy	522	97.15	76	98.1	97.1	96.2
[26]	Cotton_Plant_Diseased	924	94.59	92.4	95.7	95.1	89.7
[26]	Cotton_Plant_Healthy	517	98.06	100	98.1	98.1	98.1
[17]	Flower_Alpine Sea Holly	37	100	100	100	100	100
[17]	Flower_Anthurium	94	94.74	100	94.7	89.5	100
[17]	Flower_Artichoke	69	100	85.7	100	100	85.7
[17]	Flower_Azalea	85	82.35	52.9	94.1	88.2	82.4
[17]	Flower_Ball Moss	40	87.5	87.5	75	87.5	100
[17]	Flower_Balloon Flower	42	77.78	88.9	77.8	66.7	77.8
[17,18]	Flower_Barbeton Daisy	116	95.65	82.6	100	95.7	100
[17]	Flower_Bearded Iris	51	100	90.9	72.7	90.9	72.7
[17]	Flower_Bee Balm	55	90.91	81.8	90.9	81.8	90.9
[17]	Flower_Bird Of Paradise	75	100	93.3	86.7	100	80
[17]	Flower_Bishop Of Llandaff	101	100	100	100	100	100
[17]	Flower_Blackberry Lily	42	100	100	100	100	100
[17]	Flower_Black-Eyed Susan	50	100	88.9	100	100	100
[17]	Flower_Blanket Flower	41	100	100	100	100	100
[17]	Flower_Bolero Deep Blue	37	75	75	62.5	100	75
[17]	Flower_Bougainvillea	117	95.65	91.3	95.7	87	95.7
[17]	Flower_Bromelia	56	91.67	75	91.7	91.7	75
[17]	Flower_Buttercup	66	100	85.7	92.9	100	92.9
[17]	Flower_Californian Poppy	95	100	78.9	84.2	94.7	78.9
[17]	Flower_Camellia	82	58.82	52.9	64.7	76.5	76.5
[17]	Flower_Canna Lily	68	71.43	50	85.7	85.7	71.4
[17]	Flower_Canterbury Bells	38	15.5	37.5	37.5	50	37.5
[17]	Flower_Cape Flower	100	100	100	100	100	100
[17]	Flower_Carnation	50	50	40	60	70	80
[17]	Flower_Cautleya Spicata	42	88.89	88.9	100	100	100
[17]	Flower_Clematis	95	84.24	78.9	84.2	84.2	63.2
[17]	Flower_Colt'S Foot	78	100	100	100	100	100
[17]	Flower_Columbine	76	62.5	75	93.8	93.8	93.8
[17,18]	Flower_Common Dandelion	982	91.88	89.3	88.8	90.4	85.8
[17]	Flower_Corn Poppy	36	62.5	75	87.5	100	87.5
[17]	Flower_Cyclamen	171	68.97	55.2	82.8	82.8	82.8
[17]	Flower_Daffodil	55	81.82	100	81.8	100	100
[17]	Flower_Desert-Rose	53	81.82	90.9	63.6	81.8	90.9
[17]	Flower_English Marigold	61	100	46.2	100	100	76.9
[17]	Flower_Fire Lily	38	100	100	100	100	87.5
[17]	Flower_Foxglove	176	93.33	90	100	96.7	93.3
[17]	Flower_Frangipani	161	96.3	96.3	96.3	100	100
[17]	Flower_Fritillary	84	88.27	100	100	100	100
[17]	Flower_Garden Phlox	39	62.5	50	62.5	50	75
[17]	Flower_Gaura	56	83.33	75	91.7	100	91.7
[17]	Flower_Gazania	69	100	92.9	100	100	100
[17]	Flower_Geranium	100	100	100	100	95	100
[17]	Flower_Giant White Arum Lily	53	54.55	36.4	54.5	63.6	54.5
[17]	Flower_Globe Thistle	42	100	100	66.7	100	100
[17]	Flower_Globe-Flower	38	100	100	87.5	87.5	100
[17]	Flower_Grape Hyacinth	36	100	100	75	87.5	87.5
[17]	Flower_Great Masterwort	48	100	50	90	100	100
[17]	Flower_Hard-Leaved Pocket Orchid	55	100	100	100	90.9	100
[17]	Flower_Hibiscus	150	95.83	95.8	95.8	100	87.5
[17]	Flower_Hippeastrum	68	78.57	92.9	100	100	92.9
[17]	Flower_Japanese Anemone	51	90.91	90.9	63.6	90.9	72.7
[17]	Flower_King Protea	43	88.89	77.8	66.7	77.8	44.4
[17]	Flower_Lenten Rose	59	66.67	75	50	83.3	58.3
[17]	Flower_Lotus	156	96	100	96	96	100
[17]	Flower_Love In The Mist	38	50	62.5	75	62.5	62.5
[17]	Flower_Magnolia	57	75	75	91.7	83.3	100
[17]	Flower_Mallow	61	76.92	61.5	69.2	84.6	92.3
[17]	Flower_Marigold	64	100	100	100	100	92.3
[17]	Flower_Mexican Aster	35	100	100	85.7	100	100
[17]	Flower_Mexican Petunia	78	100	93.8	100	100	93.8
[17]	Flower_Monkshood	44	44.44	33.3	77.8	100	88.9
[17]	Flower_Moon Orchid	34	71.43	42.9	100	85.7	100
[17]	Flower_Morning Glory	103	95.27	85.7	90.5	100	100
[17]	Flower_Orange Dahlia	60	100	100	100	100	100
[17]	Flower_Osteospermum	57	100	100	100	100	83.3
[17]	Flower_Oxeye Daisy	679	91.21	83.8	89.7	89.7	90.4
[17]	Flower_Passion Flower	259	100	95.7	97.8	95.7	95.7
[17]	Flower_Pelargonium	64	100	100	92.3	100	100
[17]	Flower_Peruvian Lily	76	87.5	68.8	93.8	100	81.3
[17]	Flower_Petunia	264	95.74	91.5	100	100	91.5
[17]	Flower_Pincushion Flower	55	90.91	90.9	90.9	100	100
[17]	Flower_Pink Primrose	35	85.71	71.4	71.4	100	100
[17]	Flower_Pink-Yellow Dahlia	99	100	100	100	100	100
[17]	Flower_Poinsettia	82	94.15	76.5	88.2	100	100
[17]	Flower_Primula	79	100	93.8	100	81.3	100
[17]	Flower_Prince Of Wales Feathers	37	87.5	62.5	75	62.5	87.5
[17]	Flower_Purple Coneflower	76	100	93.8	93.8	100	93.8
[17]	Flower_Red Ginger	40	87.5	75	100	87.5	62.5
[17,18]	Flower_Rose	798	78.16	78.1	81.9	83.1	75.6
[17]	Flower_Ruby-Lipped Cattleya	68	85.71	71.4	85.7	92.9	57.1
[17,18]	Flower_Siam Tulip	36	37.5	50	15.5	75	62.5
[17]	Flower_Silverbush	47	100	100	100	100	100
[17]	Flower_Snapdragon	78	68.75	62.5	81.3	87.5	62.5
[17]	Flower_Spear Thistle	45	100	100	100	100	44.4
[17]	Flower_Spring Crocus	38	75	37.5	100	62.5	87.5
[17]	Flower_Stemless Gentian	60	83.33	58.3	83.3	83.3	58.3
[17,18]	Flower_Sunflower	756	96.71	97.4	94.7	97.4	91.4
[17]	Flower_Sweet Pea	50	33	50	70	50	60
[17]	Flower_Sweet William	71	86.67	93.3	80	80	80
[17]	Flower_Sword Lily	117	60.87	87	73.9	73.9	65.2
[17]	Flower_Thorn Apple	107	90.91	90.9	90.9	100	95.5
[17]	Flower_Tiger Lily	36	87.5	87.5	87.5	100	100
[17]	Flower_Toad Lily	38	100	100	75	100	87.5
[17]	Flower_Tree Mallow	53	81.82	100	90.9	72.7	72.7
[17]	Flower_Tree Poppy	58	100	100	100	100	100
[17]	Flower_Trumpet Creeper	54	72.73	72.7	81.8	100	72.7
[17]	Flower_Tulips	799	70	83.8	81.9	88.8	75.6
[17]	Flower_Wallflower	205	97.17	97.1	91.4	94.3	97.1
[17]	Flower_Water Lily	196	88.27	88.2	85.3	91.2	88.2
[17]	Flower_Watercress	199	97.06	97.1	91.2	100	97.1
[17]	Flower_Wild Pansy	77	87.5	100	100	100	100
[17]	Flower_Windflower	51	90.91	90.9	81.8	100	100
[17]	Flower_Yellow Iris	45	100	100	100	100	100
[32]	Gauva _Diseased	172	82.76	86.2	93.1	100	93.1
[32]	Gauva _Healthy	307	80.36	82.1	92.9	92.9	91.1
[24,25]	Grape_Black_Rot	1574	96.39	99.2	98	98.4	97.6
[24,25]	Grape_Esca_(Black_Measles)	1683	85.56	85.2	99.6	99.6	99.3
[24,25]	Grape_Healthy	491	96.97	97	98	96	94.9
[24,25]	Grape_Leaf_Blight_(Isariopsis_Leaf_Spot)	1076	99.54	94	100	99.5	99.5
[32]	Jamun_Diseased	345	98.55	85.5	88.4	89.9	89.9
[32]	Jamun_Healthy	309	80.36	94.6	89.3	96.4	92.9
[32]	Jatropha _Diseased	157	76	88	48	84	96
[32]	Jatropha _Healthy	163	88.89	11.1	96.3	85.2	63
[15]	Leaf_Abies_Concolor	281	49.02	84.3	64.7	86.3	62.7
[15]	Leaf_Abies_Nordmanniana	189	100	96.9	87.5	93.8	87.5
[15]	Leaf_Acer_Campestre	174	100	100	100	100	100
[15]	Leaf_Acer_Ginnala	181	100	93.5	100	100	100
[15]	Leaf_Acer_Griseum	159	92.31	96.2	96.2	100	96.2
[15]	Leaf_Acer_Negundo	262	93.48	91.3	97.8	95.7	89.1
[15]	Leaf_Acer_Palmatum	242	90.7	100	97.7	100	100
[15]	Leaf_Acer_Pensylvanicum	185	93.55	96.8	93.5	96.8	100
[15]	Leaf_Acer_Platanoides	170	85.71	92.9	92.9	96.4	100
[15]	Leaf_Acer_Pseudoplatanus	165	96.3	100	88.9	100	96.3
[15]	Leaf_Acer_Rubrum	330	98.33	98.3	95	100	88.3
[15]	Leaf_Acer_Saccharinum	220	94.74	100	100	100	100
[15]	Leaf_Acer_Saccharum	216	97.3	94.6	100	100	97.3
[15]	Leaf_Aesculus_Flava	161	28.93	55.6	59.3	92.6	66.7
[15]	Leaf_Aesculus_Glabra	194	87.88	75.8	90.9	93.9	72.7
[15]	Leaf_Aesculus_Hippocastamon	169	89.32	100	100	100	100
[15]	Leaf_Aesculus_Pavi	258	93.33	97.8	95.6	97.8	97.8
[15]	Leaf_Ailanthus_Altissima	153	75	87.5	91.7	87.5	87.5
[15]	Leaf_Albizia_Julibrissin	174	96.55	93.1	100	100	100
[16]	Leaf_Alnus_Incana	75	53.33	86.7	100	100	100
[15]	Leaf_Amelanchier_Arborea	161	48.18	77.8	59.3	85.2	70.4
[15]	Leaf_Amelanchier_Canadensis	185	80.65	83.9	77.4	80.6	87.1
[15]	Leaf_Amelanchier_Laevis	181	96.77	93.5	93.5	100	93.5
[15]	Leaf_Asimina_Triloba	279	96	100	92	98	94
[15]	Leaf_Betula_Alleghaniensis	183	93.55	64.5	90.3	87.1	100
[15]	Leaf_Betula_Jacqemontii	172	96.55	96.6	96.6	100	75.9
[15]	Leaf_Betula_Lenta	161	74.07	96.3	88.9	81.5	77.8
[15]	Leaf_Betula_Nigra	170	82.17	60.7	78.6	92.9	67.9
[15]	Leaf_Betula_Populifolia	176	96.67	90	96.7	100	96.7
[16]	Leaf_Betula_Pubescens	75	40	93.3	100	100	93.3
[15]	Leaf_Broussonettia_Papyrifera	327	94.92	84.7	91.5	94.9	89.8
[15]	Leaf_Carpinus_Betulus	165	77.78	92.6	55.6	85.2	85.2
[15]	Leaf_Carpinus_Caroliniana	209	61.11	91.7	94.4	86.1	75
[15]	Leaf_Carya_Cordiformis	230	85	82.5	92.5	92.5	87.5
[15]	Leaf_Carya_Glabra	207	75	86.1	97.2	97.2	77.8
[15]	Leaf_Carya_Ovata	185	70.97	93.5	83.9	100	93.5
[15]	Leaf_Carya_Tomentosa	203	54.32	60	88.6	88.6	68.6
[15]	Leaf_Castanea_Dentata	191	96.97	90.9	90.9	97	93.9
[15]	Leaf_Catalpa_Bignonioides	247	68.21	90.9	93.2	97.7	97.7
[15]	Leaf_Catalpa_Speciosa	222	82.05	76.9	87.2	92.3	82.1
[15]	Leaf_Cedrus_Atlantica	189	43.75	50	65.6	78.1	62.5
[15]	Leaf_Cedrus_Deodara	153	37.5	75	45.8	79.2	95.8
[15]	Leaf_Cedrus_Libani	197	44.15	61.8	76.5	82.4	29.5
[15]	Leaf_Celtis_Occidentalis	163	92.59	96.3	96.3	100	92.6
[15]	Leaf_Celtis_Tenuifolia	177	96.67	100	96.7	100	93.3
[15]	Leaf_Cercidiphyllum_Japonicum	172	93.1	100	96.6	96.6	93.1
[15]	Leaf_Cercis_Canadensis	246	100	95.5	97.7	97.7	88.6
[15]	Leaf_Chamaecyparis_Pisifera	202	97.17	100	100	100	100
[15]	Leaf_Chamaecyparis_Thyoides	195	96.97	100	97	100	84.8
[15]	Leaf_Chionanthus_Retusus	173	86.24	55.2	82.8	100	41.4
[15]	Leaf_Chionanthus_Virginicus	247	86.36	90.9	84.1	97.7	90.9
[15]	Leaf_Cladrastis_Lutea	200	100	100	100	100	94.1
[15]	Leaf_Cornus_Florida	205	77.17	82.9	37.1	80	85.7
[15]	Leaf_Cornus_Kousa	165	77.78	85.2	92.6	92.6	74.1
[15]	Leaf_Cornus_Mas	194	84.85	81.8	69.7	75.8	78.8
[15]	Leaf_Corylus_Colurna	84	100	100	100	100	100
[15]	Leaf_Crataegus_Crus-Galli	119	62.5	83.3	95.8	95.8	79.2
[15]	Leaf_Crataegus_Laevigata	173	89.66	96.6	100	100	100
[15]	Leaf_Crataegus_Phaenopyrum	172	93.1	100	96.6	100	82.8
[15]	Leaf_Crataegus_Pruinosa	184	74.22	100	100	96.8	90.3
[15]	Leaf_Crataegus_Viridis	195	87.88	75.8	93.9	90.9	81.8
[15]	Leaf_Cryptomeria_Japonica	242	100	95.3	100	100	97.7
[15]	Leaf_Diospyros_Virginiana	278	78	70	92	90	84
[15]	Leaf_Eucommia_Ulmoides	221	82.05	94.9	100	100	87.2
[15]	Leaf_Evodia_Daniellii	118	100	100	100	100	100
[15]	Leaf_Fagus_Grandifolia	184	100	90.3	87.1	93.5	100
[16]	Leaf_Fagus_Silvatica	75	0	93.3	100	100	73.3
[15]	Leaf_Ficus_Carica	195	100	100	97	100	100
[15]	Leaf_Fraxinus_Americana	103	76.22	81	81	100	76.2
[15]	Leaf_Fraxinus_Nigra	235	92.68	82.9	85.4	97.6	92.7
[15]	Leaf_Fraxinus_Pennsylvanica	165	96.3	100	100	100	85.2
[15]	Leaf_Ginkgo_Biloba	171	96.55	100	89.7	100	100
[15]	Leaf_Gleditsia_Triacanthos	228	100	100	95	92.5	100
[15]	Leaf_Gymnocladus_Dioicus	178	80	83.3	96.7	100	60
[15]	Leaf_Halesia_Tetraptera	174	89.66	86.2	72.4	93.1	96.6
[15]	Leaf_Ilex_Opaca	274	93.88	100	81.6	100	87.8
[15]	Leaf_Juglans_Cinerea	247	93.21	86.4	95.5	93.2	95.5
[15]	Leaf_Juglans_Nigra	193	66.67	78.8	93.9	90.9	78.8
[15]	Leaf_Juniperus_Virginiana	116	95.65	78.3	95.7	100	78.3
[15]	Leaf_Koelreuteria_Paniculata	224	97.44	100	100	100	100
[15]	Leaf_Larix_Decidua	180	60	56.7	70	76.7	63.3
[15]	Leaf_Liquidambar_Styraciflua	196	100	100	100	97.1	100
[15]	Leaf_Liriodendron_Tulipifera	265	87.26	100	100	100	95.7
[15]	Leaf_Maclura_Pomifera	448	94.44	81.1	98.9	93.3	85.6
[15]	Leaf_Magnolia_Acuminata	178	100	90	96.7	100	90
[15]	Leaf_Magnolia_Denudata	210	94.44	97.2	94.4	94.4	86.1
[15]	Leaf_Magnolia_Grandiflora	165	100	100	92.6	100	92.6
[15]	Leaf_Magnolia_Macrophylla	174	48.31	100	100	100	93.1
[15]	Leaf_Magnolia_Soulangiana	56	19.67	75	50	58.3	50
[15]	Leaf_Magnolia_Stellata	197	58.82	88.2	55.9	64.7	67.6
[15]	Leaf_Magnolia_Tripetala	182	93.55	90.3	100	96.8	100
[15]	Leaf_Magnolia_Virginiana	208	88.89	83.3	94.4	100	94.4
[15]	Leaf_Malus_Angustifolia	85	58.82	58.8	52.9	88.2	58.8
[15]	Leaf_Malus_Baccata	185	87.1	87.1	45.2	87.1	80.6
[15]	Leaf_Malus_Coronaria	181	61.32	58.1	90.3	77.4	77.4
[15]	Leaf_Malus_Floribunda	181	51.61	83.9	87.1	100	71
[15]	Leaf_Malus_Hupehensis	182	70.97	80.6	80.6	100	87.1
[15]	Leaf_Malus_Pumila	203	80	94.3	65.7	94.3	80
[15]	Leaf_Metasequoia_Glyptostroboides	202	97.17	97.1	97.1	100	97.1
[15]	Leaf_Morus_Alba	172	96.55	93.1	96.6	100	93.1
[15]	Leaf_Morus_Rubra	169	64.32	75	92.9	96.4	75
[15]	Leaf_Nyssa_Sylvatica	194	78.79	87.9	63.6	75.8	93.9
[15]	Leaf_Ostrya_Virginiana	239	88.1	81	97.6	100	61.9
[15]	Leaf_Oxydendrum_Arboreum	197	85.32	88.2	97.1	100	85.3
[15]	Leaf_Paulownia_Tomentosa	172	72.41	79.3	89.7	93.1	79.3
[15]	Leaf_Phellodendron_Amurense	177	56.67	86.7	93.3	86.7	19.7
[15]	Leaf_Picea_Abies	198	85.32	73.5	88.2	88.2	38.2
[15]	Leaf_Picea_Orientalis	194	60.61	72.7	63.6	84.8	78.8
[15]	Leaf_Picea_Pungens	199	73.53	88.2	91.2	94.1	85.3
[15]	Leaf_Pinus_Bungeana	204	85.71	77.1	88.6	94.3	88.6
[15]	Leaf_Pinus_Cembra	209	36.11	91.7	94.4	97.2	30.8
[15]	Leaf_Pinus_Densiflora	194	87.88	93.9	97	93.9	69.7
[15]	Leaf_Pinus_Echinata	192	63.64	81.8	84.8	81.8	57.6
[15]	Leaf_Pinus_Flexilis	200	58.82	70.6	41.2	64.7	58.8
[15]	Leaf_Pinus_Koraiensis	191	78.79	45.5	90.9	66.7	84.8
[15]	Leaf_Pinus_Nigra	191	87.88	90.9	93.9	90.9	72.7
[15]	Leaf_Pinus_Parviflora	201	80	97.1	74.3	100	77.1
[15]	Leaf_Pinus_Peucea	190	68.75	40.6	65.6	87.5	56.3
[15]	Leaf_Pinus_Pungens	189	84.38	96.9	78.1	81.3	90.6
[15]	Leaf_Pinus_Resinosa	153	83.33	87.5	100	100	66.7
[15]	Leaf_Pinus_Rigida	153	45.83	50	70.8	91.7	33.3
[15]	Leaf_Pinus_Strobus	170	71.43	57.1	82.1	96.4	71.4
[15]	Leaf_Pinus_Sylvestris	183	87.1	96.8	100	100	48.4
[15]	Leaf_Pinus_Taeda	193	63.64	93.9	90.9	87.9	81.8
[15]	Leaf_Pinus_Thunbergii	163	61.54	61.5	33.8	38.5	84.6
[15]	Leaf_Pinus_Virginiana	195	60.61	66.7	54.5	54.5	30.3
[15]	Leaf_Pinus_Wallichiana	190	93.75	90.6	93.8	90.6	93.8
[15]	Leaf_Platanus_Acerifolia	170	92.86	85.7	89.3	100	89.3
[15]	Leaf_Platanus_Occidentalis	218	100	94.7	97.4	100	97.4
[15]	Leaf_Populus_Deltoides	196	100	100	100	100	100
[15]	Leaf_Populus_Grandidentata	192	96.97	93.9	97	100	100
[15,16]	Leaf_Populus_Tremuloides	266	95.83	85.4	97.9	100	93.8
[15]	Leaf_Prunus_Pensylvanica	180	96.67	60	76.7	83.3	90
[15]	Leaf_Prunus_Sargentii	321	62.07	81	100	98.3	93.1
[15]	Leaf_Prunus_Serotina	179	66.67	36.7	26.3	76.7	66.7
[15]	Leaf_Prunus_Serrulata	165	59.29	66.7	48.1	70.4	77.8
[15]	Leaf_Prunus_Subhirtella	197	73.53	76.5	73.5	67.6	58.8
[15]	Leaf_Prunus_Virginiana	333	73.77	82	88.5	82	80.3
[15]	Leaf_Prunus_Yedoensis	167	85.71	92.9	92.9	96.4	71.4
[15]	Leaf_Pseudolarix_Amabilis	183	74.22	74.2	93.5	100	74.2
[15]	Leaf_Ptelea_Trifoliata	300	100	100	100	100	100
[15]	Leaf_Pyrus_Calleryana	202	91.43	91.4	94.3	85.7	85.7
[15]	Leaf_Quercus_Acutissima	199	94.15	85.3	97.1	100	91.2
[15]	Leaf_Quercus_Alba	205	100	91.4	100	100	91.4
[15]	Leaf_Quercus_Bicolor	175	75.86	82.8	79.3	96.6	86.2
[15]	Leaf_Quercus_Cerris	166	78.57	89.3	89.3	100	96.4
[15]	Leaf_Quercus_Coccinea	172	93.1	89.7	89.7	100	86.2
[15]	Leaf_Quercus_Falcata	60	91.67	91.7	91.7	100	91.7
[15]	Leaf_Quercus_Imbricaria	173	65.52	82.8	93.1	96.6	86.2
[15]	Leaf_Quercus_Macrocarpa	194	84.85	90.9	90.9	97	84.8
[15]	Leaf_Quercus_Marilandica	207	100	97.2	97.2	100	88.9
[15]	Leaf_Quercus_Michauxii	198	76.47	91.2	88.2	94.1	94.1
[15]	Leaf_Quercus_Montana	277	100	92	100	100	98
[15]	Leaf_Quercus_Muehlenbergii	259	76.09	67.4	29.1	52.2	45.7
[15]	Leaf_Quercus_Nigra	194	90.91	81.8	97	100	84.8
[15]	Leaf_Quercus_Palustris	165	96.3	96.3	96.3	96.3	96.3
[15]	Leaf_Quercus_Phellos	165	100	100	100	100	100
[15]	Leaf_Quercus_Robur	173	86.24	100	100	96.6	100
[15]	Leaf_Quercus_Rubra	71	86.67	73.3	86.7	100	33.3
[15]	Leaf_Quercus_Shumardii	188	100	100	96.9	100	100
[15]	Leaf_Quercus_Stellata	202	97.17	97.1	97.1	97.1	91.4
[15]	Leaf_Quercus_Velutina	202	97.17	97.1	100	100	100
[15]	Leaf_Quercus_Virginiana	195	81.82	90.9	97	90.9	90.9
[15]	Leaf_Robinia_Pseudo-Acacia	175	82.76	86.2	100	93.1	96.6
[16]	Leaf_Salix_Alba_Seicea	75	29.67	100	100	100	100
[15,16]	Leaf_Salix_Aurita	75	6.67	100	100	100	100
[15]	Leaf_Salix_Babylonica	201	94.32	88.6	100	100	100
[15]	Leaf_Salix_Caroliniana	197	94.15	97.1	97.1	97.1	70.6
[15]	Leaf_Salix_Matsudana	196	97.06	82.4	97.1	97.1	91.2
[15]	Leaf_Salix_Nigra	227	72.5	72.5	85	92.5	55
[15]	Leaf_Salix_Sinerea	75	46.67	100	100	100	100
[16]	Leaf_Sassafras_Albidum	162	92.59	100	96.3	92.6	92.6
[16]	Leaf_Sorbus_Aucuparia	75	100	100	100	100	100
[16]	Leaf_Sorbus_Intermedia	75	93.33	100	100	100	100
[15]	Leaf_Staphylea_Trifolia	243	97.67	97.7	93	100	95.3
[15]	Leaf_Stewartia_Pseudocamellia	195	72.73	84.8	97	97	51.5
[15]	Leaf_Styrax_Japonica	261	71.74	60.9	87	95.7	60.9
[15]	Leaf_Styrax_Obassia	79	81.28	81.3	75	81.3	75
[15]	Leaf_Syringa_Reticulata	98	85	100	95	100	95
[15]	Leaf_Taxodium_Distichum	206	83.33	97.2	100	100	100
[15]	Leaf_Tilia_Americana	189	78.16	93.8	87.5	90.6	87.5
[15]	Leaf_Tilia_Cordata	227	70	90	87.5	97.5	85
[15]	Leaf_Tilia_Europaea	165	59.29	66.7	92.6	92.6	100
[15]	Leaf_Tilia_Tomentosa	175	89.66	96.6	100	96.6	96.6
[15]	Leaf_Toona_Sinensis	64	100	92.3	100	100	100
[15]	Leaf_Tsuga_Canadensis	219	89.47	97.4	97.4	100	94.7
[15]	Leaf_Ulmus_Americana	245	76.74	81.4	95.3	93	65.1
[15,16]	Leaf_Ulmus_Carpinifolia	75	0	93.3	100	80	66.7
[15,16]	Leaf_Ulmus_Glabra	265	72.34	87.2	93.6	97.9	63.8
[15]	Leaf_Ulmus_Parvifolia	195	96.97	100	97	100	97
[15]	Leaf_Ulmus_Procera	153	62.5	87.5	91.7	95.8	45.8
[15]	Leaf_Ulmus_Pumila	295	96.26	92.5	98.1	92.5	88.7
[15]	Leaf_Ulmus_Rubra	320	89.06	96.9	93.8	98.4	95.3
[15]	Leaf_Zelkova_Serrata	216	70.3	94.6	94.6	97.3	78.4
[24,27]	Lemon_Diseased	6165	98.46	98.5	99.1	99.2	99.6
[27]	Lemon_Healthy	247	86.36	97.7	88.6	100	79.5
[32]	Mango _Diseased	295	88.68	83	96.2	96.2	86.8
[32]	Mango _Healthy	200	100	100	100	97.1	100
[19]	Mushrooms_Agaricus	976	76.02	83.2	69.9	74.5	74.5
[19]	Mushrooms_Amanita	750	90	78	81.3	90	78.7
[19]	Mushrooms_Boletus	1073	90.26	94.4	95.3	94	93
[19]	Mushrooms_Cortinarius	836	75.6	63.7	79.8	67.9	67.9
[19]	Mushrooms_Entoloma	839	62.5	70.2	74.4	65.5	61.3
[19]	Mushrooms_Exidia	435	78.19	71.3	81.6	87.4	77
[19]	Mushrooms_Hygrocybe	745	84.56	90.6	85.2	89.9	90.6
[19]	Mushrooms_Inocybe	621	45.97	37.1	32.3	57.3	54.8
[19]	Mushrooms_Lactarius	1088	47.28	75.7	75.7	72.5	74.3
[19]	Mushrooms_Pluteus	441	31.09	38.2	33.3	46.1	40.4
[19]	Mushrooms_Russula	1073	87.44	86.5	73.5	90.7	92.1
[19]	Mushrooms_Suillus	661	72.21	80.5	69.2	73.7	79.7
[24]	Peach_Bacterial_Spot	2630	100	99.3	99.8	99.8	99.6
[24,25]	Peach_Healthy	438	81.82	86.4	83	94.3	92
[24,25]	Pepper_Bell_Bacterial_Spot	1068	91.59	91.6	93.5	97.2	89.7
[24,25]	Pepper_Bell_Healthy	1877	95.57	95.6	96.5	97.5	97.2
[21]	Pest_Bemisia_Argentifolii	423	95.32	96.5	97.6	98.8	94.1
[21]	Pest_Helicoverpa_Armigera	756	96.03	80.8	90.7	97.4	97.4
[21]	Pest_Myzus_Persicae	910	93.99	89.6	96.2	100	90.2
[21]	Pest_Spodoptera_Exigua	528	79.28	95.3	95.3	95.3	85.8
[21]	Pest_Spodoptera_Litura	672	99.28	97.8	97.8	98.5	97.8
[21]	Pest_Tetranychus_Urticae	521	93.3	99	94.2	99	99
[21]	Pest_Thrips_Palmi	198	97.06	100	94.1	100	100
[21]	Pest_Zeugodacus_Cucurbitae	327	94.92	100	100	100	94.9
[32]	Pomegranate_Diseased	302	92.73	98.2	100	96.4	98.2
[32]	Pomegranate_Healthy	320	86.24	87.9	86.2	96.6	100
[32]	Pongamia_Pinnata_Diseased	306	85.71	91.1	96.4	100	91.1
[32]	Pongamia_Pinnata_Healthy	325	96.92	90.8	96.9	98.5	98.5
[24,25]	Potato_Early_Blight	1119	89.73	80.8	93.3	93.8	88.8
[24,25]	Potato_Healthy	182	70.97	93.5	96.8	100	83.9
[24,25]	Potato_Late_Blight	1105	85.97	90.5	94.1	91.9	82.8
[24,25]	Raspberry_Healthy	490	91.84	94.9	93.9	90.8	93.9
[30]	Rice_Bacterial Leaf Blight	40	75	62.5	62.5	75	75
[30]	Rice_Brown Spot	40	87.5	87.5	87.5	100	87.5
[30]	Rice_Leaf Smut	40	100	75	100	87.5	62.5
[22]	Seedling_Black-Grass	282	33.33	35.3	58.8	62.7	56.9
[22]	Seedling_Charlock	452	96.7	86.8	96.7	98.9	98.9
[22]	Seedling_Cleavers	335	73.16	94	95.5	95.5	73.1
[22]	Seedling_Common Chickweed	716	98.6	94.4	90.2	96.5	97.2
[22]	Seedling_Common Wheat	283	64.71	54.9	86.3	98	68.6
[22]	Seedling_Fat Hen	538	95.37	89.8	99.1	95.4	94.4
[22]	Seedling_Loose Silky-Bent	431	76.74	90.7	75.6	89.5	86
[22]	Seedling_Maize	287	94.26	94.2	98.1	100	98.1
[22]	Seedling_Scentless Mayweed	607	86.07	86.1	91.8	91	95.9
[22]	Seedling_Shepherd’S Purse	304	85.45	85.5	83.6	87.3	74.5
[22]	Seedling_Small-Flowered Cranesbill	576	100	100	100	100	100
[22]	Seedling_Sugar Beet	463	84.95	71	88.2	97.8	92.5
[23]	Soybean_Broadleaf	1521	99.19	97.9	97.9	97.9	99.6
[23]	Soybean_Grass	3523	99.01	99.6	99.7	100	99.1
[24,25]	Soybean_Leaf_Healthy	5185	99.32	99.6	99.2	99.3	99.4
[23]	Soybean_Plant	7376	99.93	99.2	99.9	99.9	99.7
[23]	Soybean_Soil	3279	95.54	97.8	100	100	99.5
[24]	Squash_Powdery_Mildew	2264	97.71	98.5	99.7	99.5	99
[24,25]	Strawberry_Healthy	552	81.98	97.3	95.5	99.1	99.1
[24]	Strawberry_Leaf_Scorch	1109	100	98.6	100	100	100
[24,25,31]	Tomato_Bacterial_Spot	2647	84.29	85.5	91.1	93	90.6
[24,25]	Tomato_Early_Blight	1088	89.91	71.6	87.6	92.2	93.6
[31]	Tomato_Gray Spot	84	20.65	0	20.6	41.2	47.1
[24,25,31]	Tomato_Healthy	2053	86.61	94	96.9	96.9	96.3
[24,25,31]	Tomato_Late_Blight	2421	94.1	95.5	92.2	94.8	93.9
[24,25,31]	Tomato_Leaf_Mold	1110	84.26	76.1	89.2	89.6	87.8
[31]	Tomato_Powdery Mildew	187	59.38	40.6	71.9	59.4	59.4
[24,25,31]	Tomato_Septoria_Leaf_Spot	2225	92.24	87.3	95.1	95.8	80.8
[24,25]	Tomato_Spider_Mites Two-Spotted_Spider_Mite	1978	98.81	90.2	99.4	97.9	98.5
[24]	Tomato_Target_Spot	1704	77.58	98.9	94.3	98.6	63.3
[24,25]	Tomato_Tomato_Mosaic_Virus	430	76.74	40.7	84.9	86	64
[24,25]	Tomato_Tomato_Yellow_Leaf_Curl_Virus	5432	97.27	99.2	99.3	99.2	97.9
[20]	Weed_Chinee Apple	1158	67.56	59.6	55.6	86.2	81.8
[20]	Weed_Lantana	1064	84.98	97.2	86.4	95.3	99.1
[20]	Weed_Parkinsonia	1031	91.79	88.4	92.3	93.2	98.6
[20]	Weed_Parthenium	1025	90.73	80	76.6	67.8	79.5
[20]	Weed_Prickly Acacia	1062	87.32	59.6	98.1	96.7	85.9
[20]	Weed_Rubber Vine	1009	66.34	42.1	94.6	97	89.1
[20]	Weed_Siam Weed	1074	97.67	92.1	97.2	95.8	92.1
[20]	Weed_Snake Weed	1019	52.94	66.7	94.1	87.3	58.8
